# Supplementary material for: Photosynthetic Efficiency and Glyco-Metabolism Changes in Artificial Triploid Loquats Contribute to Heterosis Manifestation
Source: MDPI journal article supplement (doi:10.3390/ijms231911337), 2022-09-26

**Table S1.** Primers used for the qRT-PCR analyses in this study.

| <b>Primers</b>   | <b>Sequence (5'-3')</b>   | <b>Tm</b> | <b>Functions of the targets</b>             |
|------------------|---------------------------|-----------|---------------------------------------------|
| <i>C41504-F</i>  | atggttggtgagaatggcggg     | 60 °C     | Leaf growth related gene                    |
| <i>C41504-R</i>  | agcttgctctgtgatccagggc    | 60 °C     | Leaf growth related gene                    |
| <i>C126732-F</i> | aaattgctgctctgatctctct    | 60 °C     | Sucrose/Starch metabolic related gene       |
| <i>C126732-R</i> | gacctgtagtctcttccctcg     | 60 °C     | Sucrose/Starch metabolic related gene       |
| <i>C126973-F</i> | ttggggacggagtagacatag     | 60 °C     | Sucrose/Starch metabolic related gene       |
| <i>C126973-R</i> | tcgtggagaggaactgaaggg     | 60 °C     | Sucrose/Starch metabolic related gene       |
| <i>C110057-F</i> | gaggctaccttgactacc        | 60 °C     | Sucrose/Starch metabolic related gene       |
| <i>C110057-R</i> | aaaatgagaaaaccgacc        | 60 °C     | Sucrose/Starch metabolic related gene       |
| <i>C124069-F</i> | tatccgcagaggagaattccgcaag | 60 °C     | Sucrose/Starch metabolic related gene       |
| <i>C124069-R</i> | ccaccaaaccaaggtagtaccagg  | 60 °C     | Sucrose/Starch metabolic related gene       |
| <i>C103155-F</i> | ccgcttcaggagatggagac      | 60 °C     | Protein processing in endoplasmic reticulum |
| <i>C103155-R</i> | cgacaatgccaatgtaggag      | 60 °C     | Protein processing in endoplasmic reticulum |
| <i>Actin-F</i>   | atccttcgtctggaccttgc      | 60 °C     | Reference gene                              |
| <i>Actin-R</i>   | gacaatttcccgttcagcagt     | 60 °C     | Reference gene                              |

**Table S2.** The five physiological indicator examinations of the parents and F1 hybrids (Triploid-A, Triploid-B), and Mid-parent Heterosis (MPH) of the F1 hybrids (Triploid-A, Triploid-B).

|                     | <b>Soluble starch (SS)</b>  | <b>Soluble protein (SP)</b> | <b>Chlorophyll A (CA)</b> | <b>Chlorophyll B (CB)</b> | <b>Total Chlorophyll (TC)</b> |
|---------------------|-----------------------------|-----------------------------|---------------------------|---------------------------|-------------------------------|
| LQ-1                | 0.23±0.0054 <sup>a</sup>    | 148.57±0.0694               | 0.8778±0.0235             | 0.5697±0.0109             | 1.4474±0.0343                 |
| GC-1                | 0.17±0.0119                 | 146.33±0.0694               | 0.9944±0.0183             | 0.7005±0.0247             | 1.6949±0.0430                 |
| MPV <sup>b</sup> -A | 0.21±0.0051                 | 147.82±0.0231               | 0.9167±0.0218             | 0.6133±0.0153             | 1.5299±0.0371                 |
| A-1                 | 0.23±0.0025                 | 150.29±0.0694               | 0.9710±0.0131             | 0.6982±0.0166             | 1.6692±0.0291                 |
|                     | 10.82% <sup>c</sup> +0.79%  | 1.67%+1.16%                 | 5.93%+(-2.36%)            | 13.84%+(-0.33%)           | 9.10%+(-1.52%)                |
| A-2                 | 0.22±0.0250                 | 147.65±0.0694               | 0.9283±0.0232             | 0.6102±0.0280             | 1.5385±0.0213                 |
|                     | 2.80%+(-6.51%)              | -0.12%+(-0.62%)             | 1.27%+(-6.65%)            | -0.50%+(-12.89%)          | 0.56%+(-9.23%)                |
| A-3                 | 0.31±0.0227                 | 138.56±0.5236               | 0.9625±0.0227             | 0.6141±0.0290             | 1.5765±0.0517                 |
|                     | 46.18%+32.95%               | -6.27%+(-6.74%)             | 5.00%+(-3.21%)            | 0.13%+(-12.34%)           | 3.04%+(-6.99%)                |
| A-4                 | 0.26±0.0238                 | 149.53±0.4548               | 0.8833±0.0154             | 0.5574±0.0116             | 1.4407±0.0267                 |
|                     | 23.84%+12.63%               | 1.16%+0.65%                 | -3.64%+(-11.18%)          | -9.11%+(-20.42%)          | -5.83%+(-15.00%)              |
| A-5                 | 0.23±0.0038                 | 149.93±0.1387               | 1.0983±0.0120             | 0.8182±0.0258             | 1.9164±0.0196                 |
|                     | 11.98%+1.84%                | 1.43%+0.92%                 | 19.81%+10.44%             | 33.40%+16.80%             | 25.26%+13.07%                 |
| A-6                 | 0.24±0.0110                 | 138.84±2.0468               | 1.0665±0.0234             | 0.7762±0.0490             | 1.8427±0.0723                 |
|                     | 13.42%+3.16%                | -6.08%+(-6.55%)             | 16.35%+7.25%              | 26.56%+10.80%             | 20.44%+8.72%                  |
| A-7                 | 0.18±0.0140                 | 133.07±0.3670               | 1.0915±0.0155             | 0.8155±0.0310             | 1.9070±0.0465                 |
|                     | -16.00%+(-23.61%)           | -9.98%+(-10.43%)            | 19.07%+9.76%              | 32.98%+16.42%             | 24.65%+12.51%                 |
| A-8                 | 0.24±0.0040                 | 128.59±0.7307               | 0.9742±0.0340             | 0.6298±0.0350             | 1.6040±0.0690                 |
|                     | 14.36%+4.01%                | -13.01%+(-13.45%)           | 6.28%+(-2.04%)            | 2.70%+(-10.09%)           | 4.84%+(-5.36%)                |
| A-9                 | 0.24±0.0260                 | 124.02±0.8409               | 0.9619±0.0173             | 0.6409±0.0187             | 1.6028±0.0359                 |
|                     | 14.73%+4.34%                | -16.10%+(-16.52%)           | 4.94%+(-3.27%)            | 4.50%+(-8.51%)            | 4.77%+(-5.43%)                |
| LQ-1                | 0.23±0.0054 <sup>a</sup>    | 148.57±0.0694               | 0.8778±0.0235             | 0.5697±0.0109             | 1.4474±0.0343                 |
| GC-23               | 0.33±0.0197                 | 137.92±0.6616               | 0.8736±0.0101             | 0.5157±0.0091             | 1.3893±0.0177                 |
| MPV <sup>b</sup> -B | 0.26±0.0058                 | 145.02±0.2666               | 0.8764±0.0189             | 0.5517±0.0087             | 1.4281±0.0276                 |
| B-1                 | 0.48±0.0401                 | 137.68±0.8855               | 1.0722±0.0201             | 0.7675±0.0390             | 1.8397±0.0590                 |
|                     | 83.53% <sup>c</sup> +47.41% | -5.06%+(-7.33%)             | 22.35%+22.15%             | 39.12%+34.72%             | 28.83%+27.10%                 |
| B-2                 | 0.24±0.0193                 | 145.56±0.5548               | 0.9433±0.0159             | 0.5959±0.0194             | 1.5392±0.0351                 |
|                     | -7.46%+(-25.68%)            | 0.38%+(-2.02%)              | 7.64%+7.47%               | 8.01%+4.60%               | 7.79%+6.34%                   |
| B-3                 | 0.69±0.0125                 | 143.76±0.2501               | 0.7829±0.0266             | 0.4754±0.0199             | 1.2583±0.0465                 |
|                     | 164.09%+112.11%             | -0.87%+(-3.23%)             | -10.66%+(-10.80%)         | -13.84%+(-16.56%)         | -11.89%+(-13.07%)             |

<sup>a</sup> mean ± standard deviation; <sup>b</sup> Mid-parent value (MPV) was calculated based on the genomics contribution by the two parents, *i.e.*, 2/3 LQ-1+1/3 GC-1/GC-23;

<sup>c</sup>Mid-parent heterosis (MPH) was calculated by using the formula  $MPH = (\text{triploids-MPV})/\text{MPV} \times 100\%$ ; This table was cited and reproduced from Liu et al., (2019) [37].

**Table S3.** Leaf thickness analyses of the parents and F1 hybrids (Triploid-A, Triploid-B), and Mid-parent Heterosis (MPH) of the F1 hybrids (Triploid-A, Triploid-B).

| Categories                                                         | LQ-1    | GC-1   | GC-23  | A-1    | A-2    | A-3    | A-4    | A-5    | A-6    | A-7    | A-8    | A-9    | B-1    | B-2    | B-3    |
|--------------------------------------------------------------------|---------|--------|--------|--------|--------|--------|--------|--------|--------|--------|--------|--------|--------|--------|--------|
| Leaf Thickness                                                     | 0.28    | 0.16   | 0.22   | 0.27   | 0.27   | 0.31   | 0.30   | 0.38   | 0.35   | 0.28   | 0.28   | 0.30   | 0.43   | 0.35   | 0.40   |
| (mm)                                                               | (0.02)* | (0.01) | (0.02) | (0.01) | (0.01) | (0.02) | (0.02) | (0.01) | (0.01) | (0.01) | (0.01) | (0.01) | (0.02) | (0.01) | (0.02) |
| MPV-A <sup>a</sup> : 0.24 (0.01); MPV-B <sup>a</sup> : 0.26 (0.01) |         |        |        |        |        |        |        |        |        |        |        |        |        |        |        |
| MPH <sup>b</sup>                                                   |         |        |        | 14.29% | 14.46% | 30.83% | 25.16% | 60.73% | 45.66% | 16.90% | 16.85% | 26.43% | 65.66% | 35.95% | 54.73% |

\* mean  $\pm$  standard deviation; <sup>a</sup> Mid-parent value (MPV) was calculated based on the genomics contribution by the two parents, *i.e.*, 2/3 LQ-1+1/3 GC-1/GC-23; <sup>b</sup>Mid-parent heterosis (MPH) was calculated by using the formula  $MPH = (\text{triploids-MPV})/\text{MPV} \times 100\%$ ; This table was cited and reproduced from Liu et al., (2019) [37].

**Figure S1.** Ploidy validation of the triploid loquats in the two cross combinations. (A) the representative images of the chromosome count and the obtained seeds in the two combinations. (B-D) ploidy validation of the triploid hybrids using flow cytometry. This figure was reproduced from Liu et al. (2018) [47].

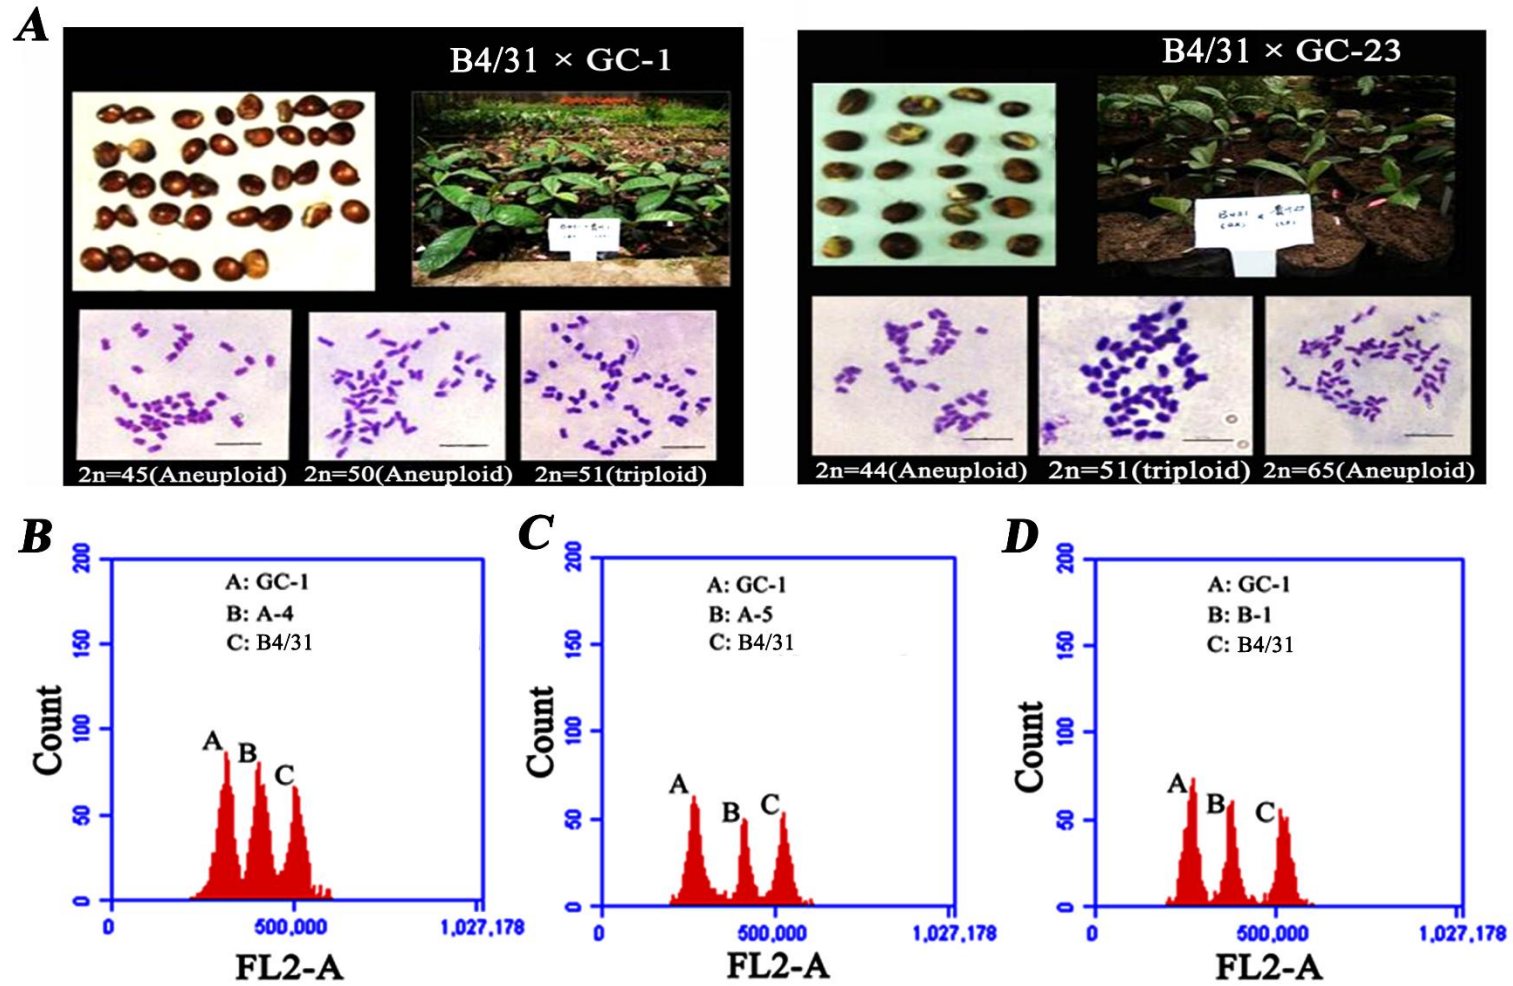

**Figure S2.** Leaf micro-structure observations of the triploid hybrids and the parents. All the sub-picture were scaled down at the same proportion. The size of the bar showed in the picture was 50  $\mu\text{m}$ . This figure was cited from Liu et al., (2019) [37].

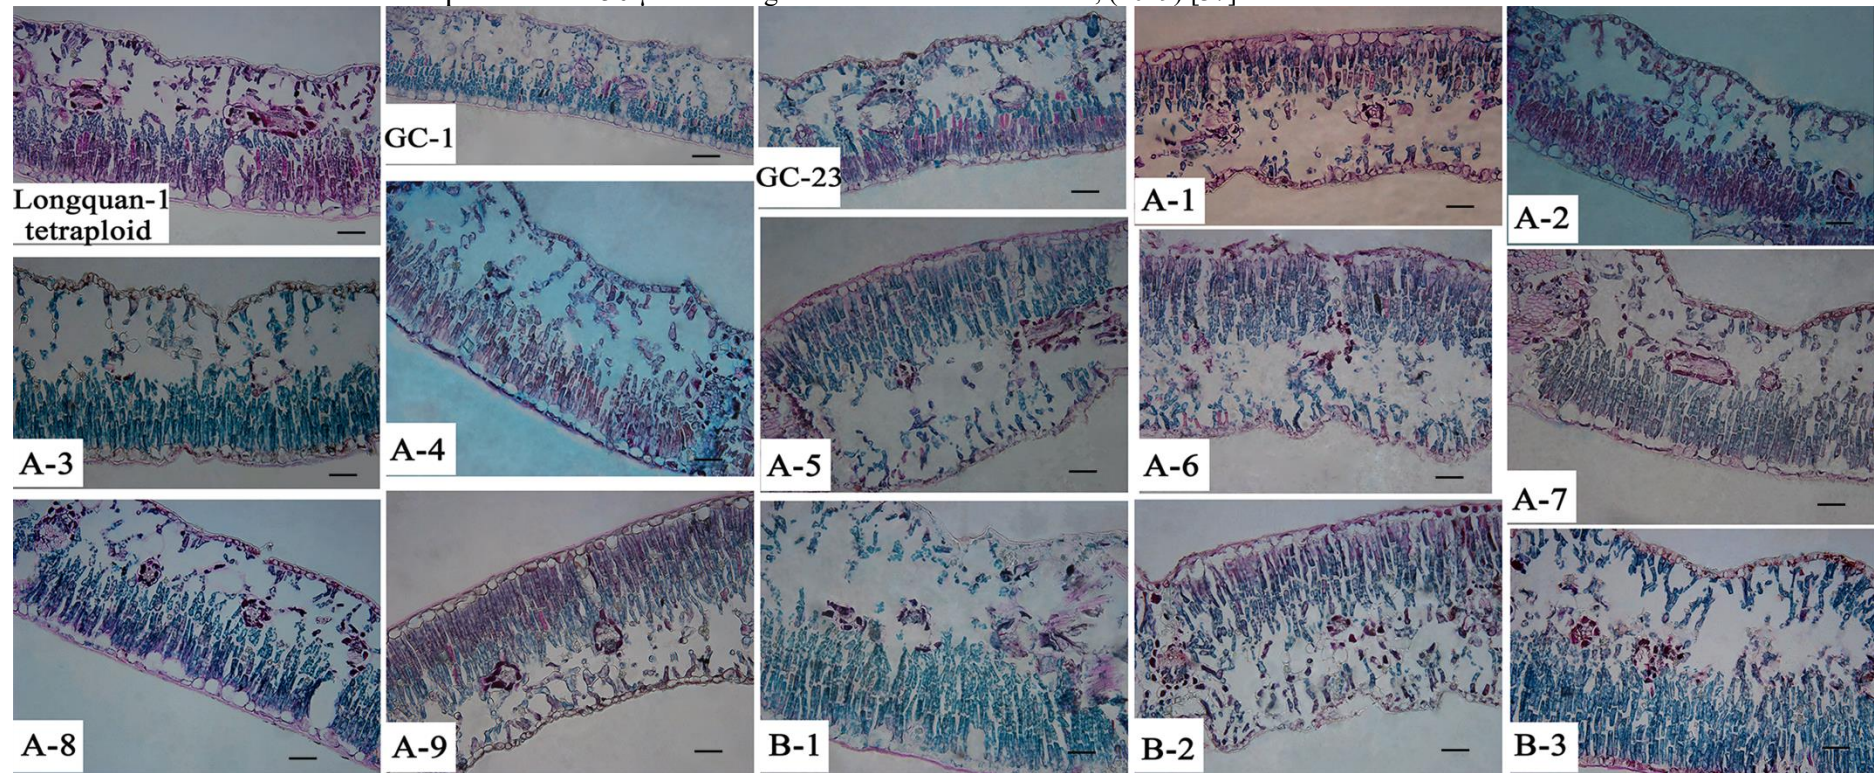



**Figure S3.** Pearson’s correlation coefficient of different replicates in the transcriptome analysis. The correlation coefficient was calculated by using log10 (FPKM+1).

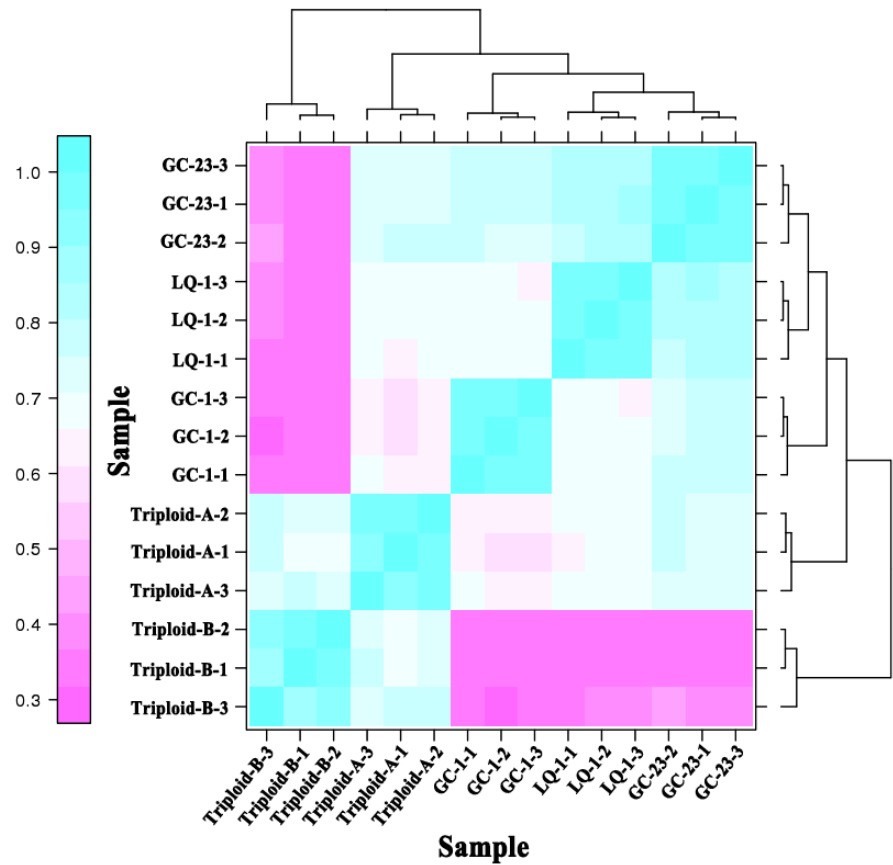

**Figure S4.** The expression (A) and length distributions (B) of the unigenes in each sample.

**A**

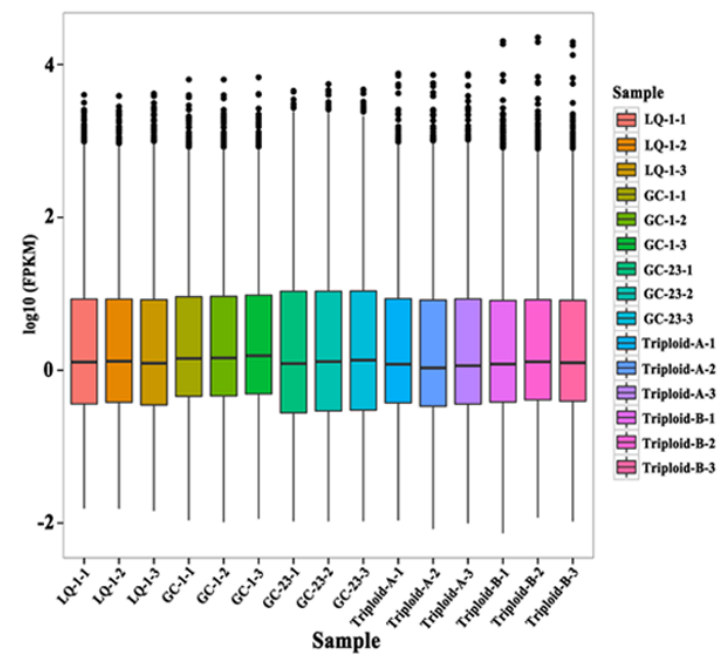

**B**

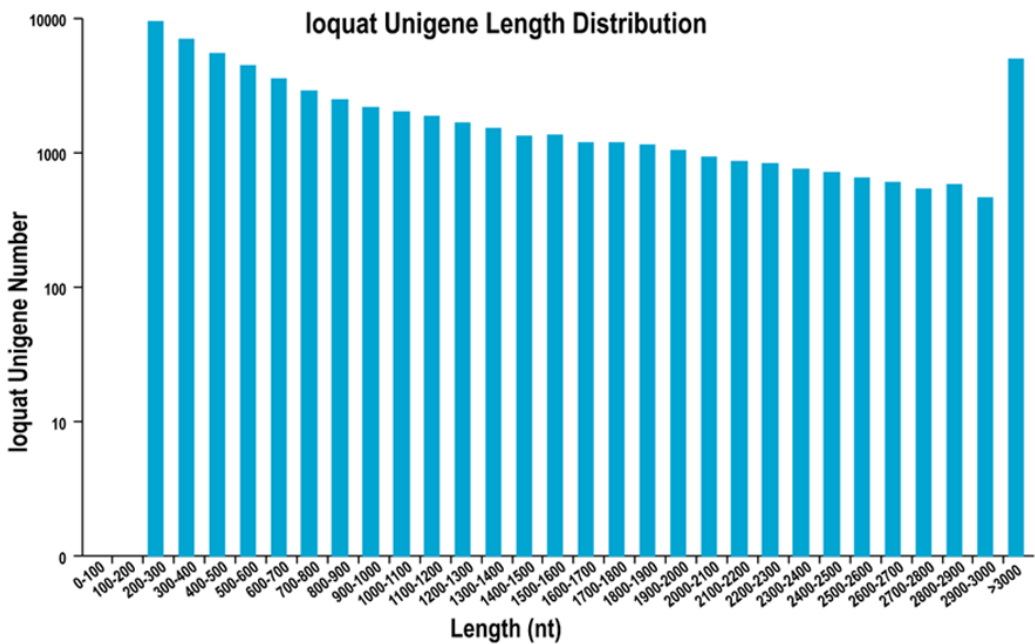

Supplement: s1 [file s1]
